# Supplementary material for: Temporal integration of conflicting directional cues in sound localization
Source: Oxford University Press journal article supplement (doi:10.1242/jeb.208751), 2019-01-01
Supplement: jeb208751supp.pdf [file jeb208751supp.pdf]

| Stimulus description                                                          | N males turning/<br>N males tested | N total turns/<br>N total trials | Text reference                                                                                                                               |
|-------------------------------------------------------------------------------|------------------------------------|----------------------------------|----------------------------------------------------------------------------------------------------------------------------------------------|
| Identical 12 syllable song on both speakers                                   | 35/46                              | 132/470                          | <i>Methods; Statistical Analyses</i>                                                                                                         |
| 3 ITD syllables at beginning, remaining simultaneous                          | 20/23                              | 78/230                           | Table 1, Fig. 2A                                                                                                                             |
| 4 ITD syllables at beginning, remaining simultaneous                          | 20/20                              | 130/200                          | Table 1, Fig. 2A, Fig. 3A                                                                                                                    |
| 6 ITD syllables at beginning, remaining simultaneous                          | 21/23                              | 105/230                          | Table 1, Fig. 2A                                                                                                                             |
| 9 ITD syllables at beginning, remaining simultaneous                          | 23/23                              | 135/230                          | Table 1, Fig. 2A                                                                                                                             |
| 3 ITD syllables at end, remaining simultaneous                                | 20/23                              | 88/230                           | Table 1, Fig. 2A                                                                                                                             |
| 4 ITD syllables at end, remaining simultaneous                                | 19/20                              | 109/200                          | Table 1, Fig. 2A, Fig. 3A                                                                                                                    |
| 6 ITD syllables at end, remaining simultaneous                                | 21/23                              | 96/230                           | Table 1, Fig. 2A                                                                                                                             |
| 9 ITD syllables at end, remaining simultaneous                                | 22/23                              | 118/230                          | Table 1, Fig. 2A                                                                                                                             |
| 12 ITD syllables                                                              | 44/46                              | 240/470                          | <i>Effects of syllable number and position on ITD lateralization</i><br>Fig. 3A                                                              |
| 4 simultaneous syllables, then 4 ITD syllables, then 4 simultaneous syllables | 20/20                              | 124/200                          |                                                                                                                                              |
| 3 ILD syllables at beginning, remaining simultaneous                          | 20/20                              | 145/200                          | Table 1, Fig. 2B, Fig. 3B                                                                                                                    |
| 4 ILD syllables at beginning, remaining simultaneous                          | 20/20                              | 168/200                          | Table 1, Fig. 2B, Fig. 3B                                                                                                                    |
| 6 ILD syllables at beginning, remaining simultaneous                          | 20/20                              | 173/200                          | Table 1, Fig. 2B, Fig. 3B                                                                                                                    |
| 3 ILD syllables at end, remaining simultaneous                                | 20/20                              | 138/200                          | Table 1, Fig. 2B, Fig. 3B                                                                                                                    |
| 4 ILD syllables at end, remaining simultaneous                                | 20/20                              | 142/200                          | Table 1, Fig. 2B, Fig. 3B                                                                                                                    |
| 6 ILD syllables at end, remaining simultaneous                                | 20/20                              | 159/200                          | Table 1, Fig. 2B, Fig. 3B                                                                                                                    |
| 12 ILD syllables                                                              | 23/23                              | 216/240                          | <i>Effects of syllable number and position on ILD lateralization</i><br><i>Effects of syllable number and position on ILD lateralization</i> |
| 3 ILD syllables (3 syllable total song)                                       | 12/15                              | 60/160                           | <i>Effects of syllable number and position on ILD lateralization</i>                                                                         |
| 3 simultaneous syllables, then 3 ILD syllables, then 6 simultaneous syllables | 20/20                              | 161/200                          | Fig. 3B                                                                                                                                      |

|                                                                                              |       |         |         |
|----------------------------------------------------------------------------------------------|-------|---------|---------|
| 6 simultaneous syllables, then 3 ILD syllables, then 3 simultaneous syllables                | 20/20 | 147/200 | Fig. 3B |
| 4 simultaneous syllables, then 4 ILD syllables, then 4 simultaneous syllables                | 20/20 | 151/200 | Fig. 3B |
| 3 simultaneous syllables, then 6 ILD syllables, then 3 simultaneous syllables                | 20/20 | 167/200 | Fig. 3B |
| 3 ITD syllables leading on one speaker, then 9 ITD syllables leading on the opposite speaker | 18/23 | 72/240  | Fig. 4A |
| 6 ITD syllables leading on one speaker, then 6 ITD syllables leading on the opposite speaker | 18/23 | 97/240  | Fig. 4A |
| 9 ITD syllables leading on one speaker, then 3 ITD syllables leading on the opposite speaker | 22/23 | 105/240 | Fig. 4A |
| 3 ILD syllables louder on one speaker, then 9 ILD syllables louder on the opposite speaker   | 23/23 | 199/240 | Fig. 4B |
| 6 ILD syllables louder on one speaker, then 6 ILD syllables louder on the opposite speaker   | 23/23 | 197/240 | Fig. 4B |
| 9 ILD syllables louder on one speaker, then 3 ILD syllables louder on the opposite speaker   | 23/23 | 217/240 | Fig. 4B |
| All syllables leading by 4 ms on one speaker, but 56 dB; opposite speaker lagging but 60 dB  | 20/20 | 165/200 | Table 3 |
| All syllables leading by 4 ms on one speaker, but 58 dB; opposite speaker lagging but 60 dB  | 20/20 | 163/200 | Table 3 |
| All syllables leading by 2 ms on one speaker, but 56 dB; opposite speaker lagging but 60 dB  | 20/20 | 155/200 | Table 3 |
| 3 ILD syllables favoring one speaker, then 9 ITD syllables favoring opposite speaker         | 20/20 | 165/200 | Fig. 4C |
| 6 ILD syllables favoring one speaker, then 6 ITD syllables favoring opposite speaker         | 20/20 | 182/200 | Fig. 4C |
| 9 ILD syllables favoring one speaker, then 3 ITD syllables favoring opposite speaker         | 20/20 | 169/200 | Fig. 4C |
| 3 ITD syllables favoring one speaker, then 9 ILD syllables favoring opposite speaker         | 20/20 | 160/200 | Fig. 4C |

|                                                                                            |       |         |         |
|--------------------------------------------------------------------------------------------|-------|---------|---------|
| 6 ITD syllables favoring one speaker,<br>then 6 ILD syllables favoring<br>opposite speaker | 20/20 | 181/200 | Fig. 4C |
| 9 ITD syllables favoring one speaker,<br>then 3 ILD syllables favoring<br>opposite speaker | 20/20 | 164/200 | Fig. 4C |

---

Stimulus description gives a written description of the stimulus. All stimuli were 12-syllable songs unless otherwise noted. N males turning /N males tested gives sample size as the number of males that gave at least one turning response out of the number of total males that were tested with each stimulus. In some cases, some males did not turn at all during the ten repetitions of a given stimulus. Note that males were usually tested with more than one stimulus. Each male was usually exposed to 10 repetitions of the stimulus. The column N total turns/ N total trials gives the summed total of all turns across males over the summed total of all trials across males. Text reference denotes where in the Results section of the main text that the stimulus is discussed. When this could not be referred to a specific figure or table, the subheading in the Results section (or in one case, the Methods section) in which the stimulus is discussed is given.
